# Supplementary material for: Two new POM-based compounds containing a linear tri-nuclear copper(II) cluster and an infinite copper(II) chain, respectively
Source: publisher site journal article supplement (doi:10.1515/znb-2016-0115), 2016-09-22
Supplement: Supplementary file 1 [file B16115-suppinfo2a.doc]

**Supporting Information**

Ai-xiang Tian, Ya-li Ning, Huai-ping Ni, Xue Hou, Ru Xiao, Jun Ying

**Two new POM-based compounds containing a linear tri-nuclear copper(II) cluster and an infinite copper(II) chain, respectively**

DOI: 10.1515/znb-2016-0115

Department of Chemistry, Bohai University, Jinzhou, 121013, P. R. China

**Corresponding author:** Ai-xiang Tian. E-mail: [tian@bhu.edu.cn](mailto:tian@bhu.edu.cn), [ying@bhu.edu.cn](mailto:ying@bhu.edu.cn)


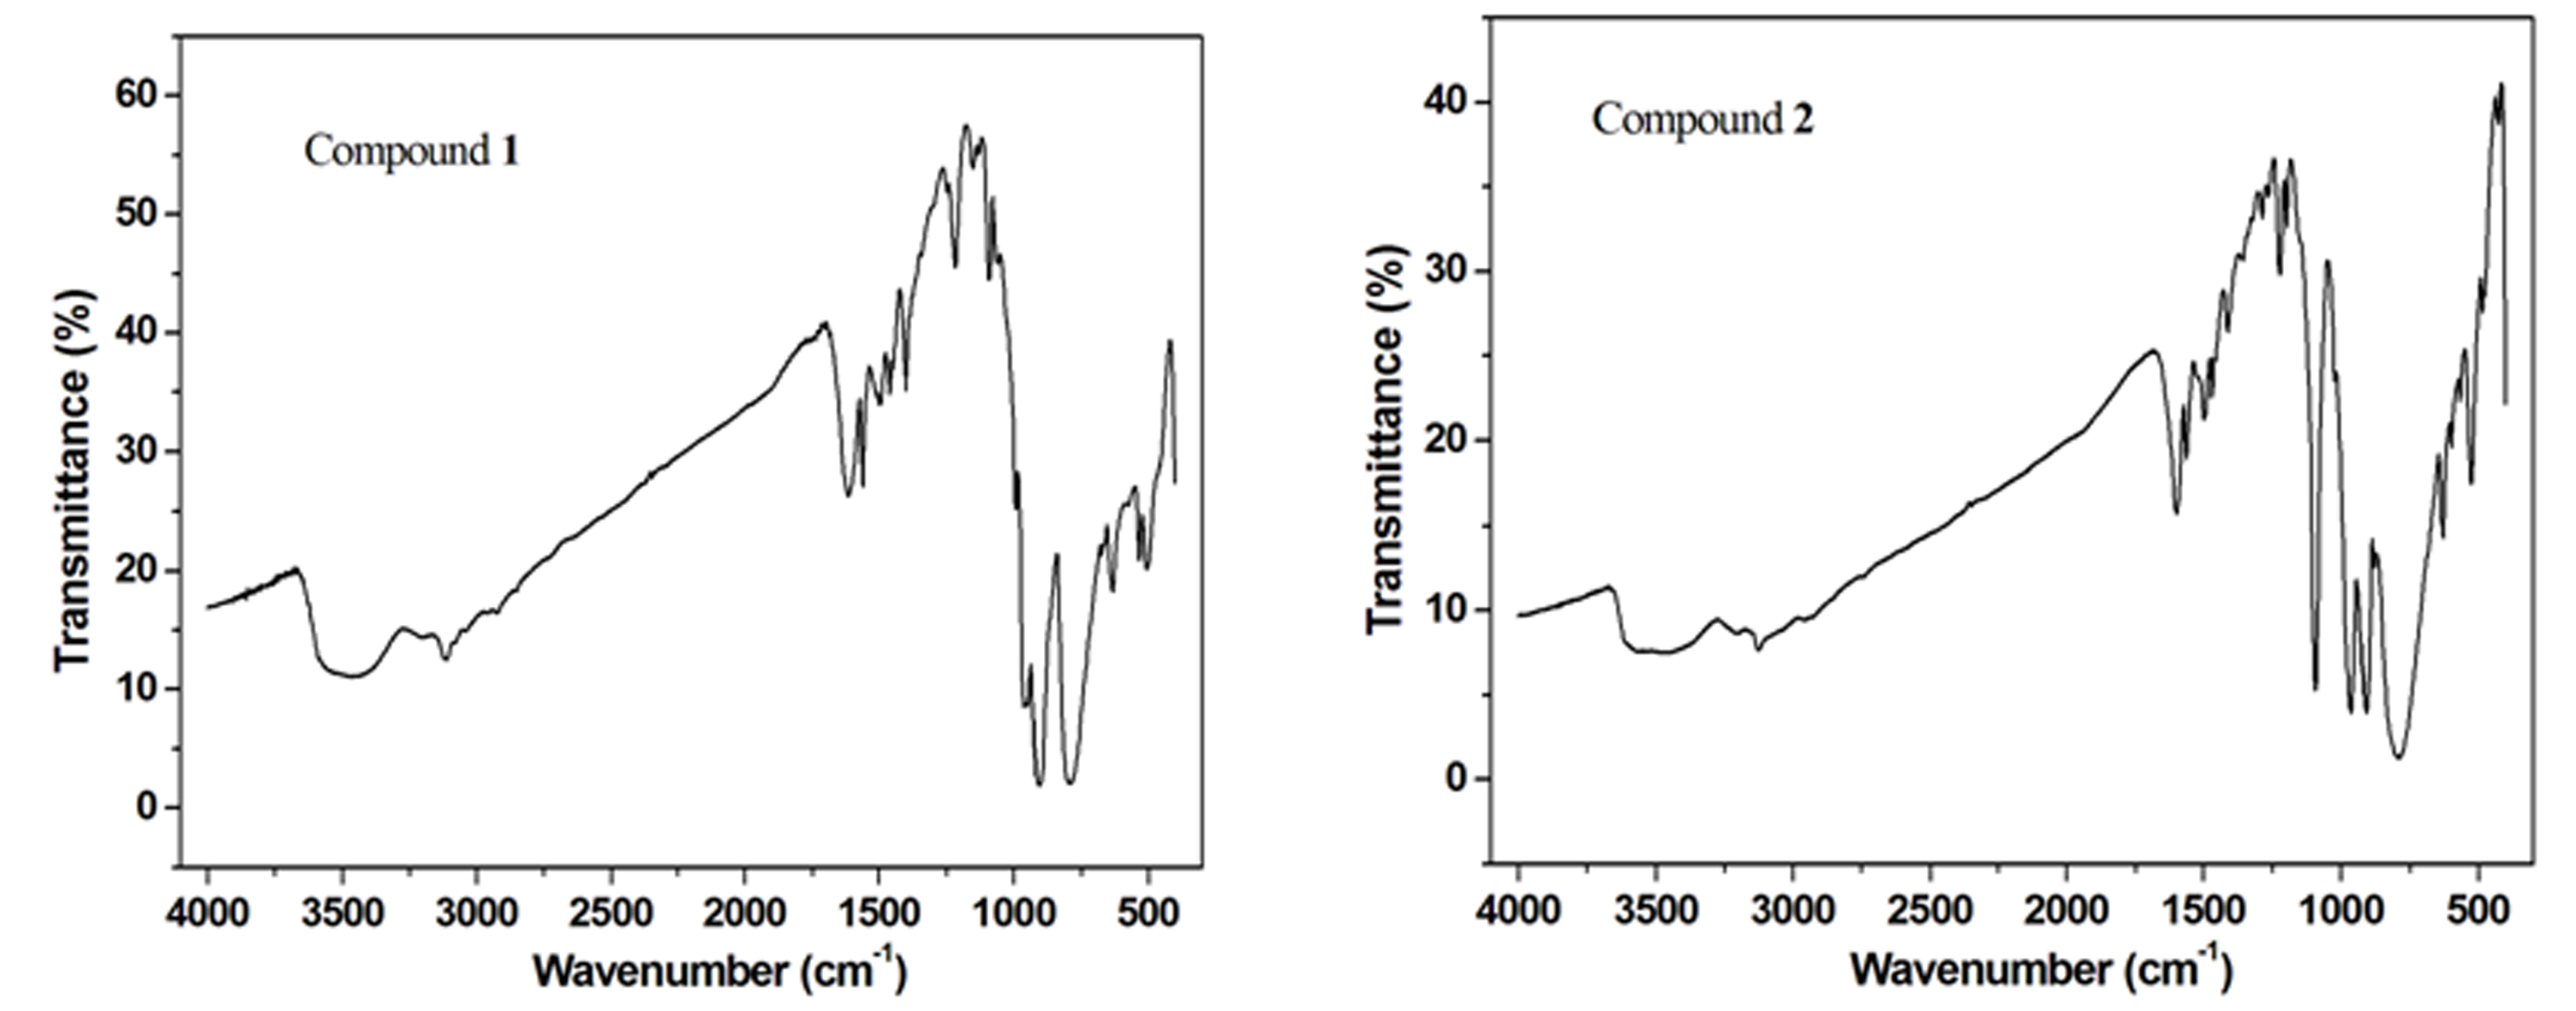


Fig. S1. The IR spectra of compounds **1** and **2**.

Table S1.Selected bond distances (Å) and angles (deg) for compounds **1** and **2**.

| Compound **1** | | | |
| --- | --- | --- | --- |
| Cu1–N7 | 1.97(2) | Cu1–N4 | 2.004(18) |
| Cu1–O2W | 2.435(17) | Cu2–N1 | 1.97(2) |
| Cu2–N5 | 2.007(16) | Cu2–N8 | 1.98(2) |
| O1W–Cu2 | 1.938(2) | O12–Cu2 | 2.231(18) |
| N4–Cu1–N4#1 N7–Cu1–N7#1 O2W–Cu1–O2W#1 | 180.0 | N7#1–Cu1–N4 | 91.5(8) |
| N7–Cu1–N4 | 88.5(8) | N7–Cu1–O2W | 90.4(8) |
| N4–Cu1–O2W | 87.2(6) | N4#1–Cu1–O2W | 92.8(6) |
| O1W–Cu2–N1 | 92.2(10) | O1W–Cu2–N8 | 90.6(9) |
| N1–Cu2–N8 | 173.4(8) | O1W–Cu2–N5 | 177.8(9) |
| N1–Cu2–O12 | 98.4(8) | N8–Cu2–O12 | 87.4(7) |
| N5–Cu2–O12 | 83.8(7) | O1W–Cu2–O12 | 95.4(9) |
| Symmetry transformation used to generate equivalent atoms for **1**: #1 –*x*+1, –*y*, –*z* | | | |
| Compound **2** | | | |
| Cu1–O1W | 1.902(8) | Cu1–N5 | 1.988(9) |
| O1W–Cu2 | 1.885(8) | Cu2–O2W | 1.874(8) |
| Cu2–N2 | 1.97(10) | Cu2–N4 | 2.003(10) |
| Cu2–O28 | 2.86(8) | O2W–Cu3 | 1.906(8) |
| Cu3–N1 | 1.980(9) | Cu3–O6 | 2.78(8) |
| O1W–Cu1–O1W#1 N5–Cu1–N5#1 | 180.0 | O1W–Cu1–N5 | 92.2(4) |
| O2W–Cu2–O1W | 158.8(5) | O2W–Cu2–N2 | 88.5(4) |
| O2W–Cu2–N4 | 97.0(4) | O1W–Cu2–N4 | 89.1(4) |
| N2–Cu2–N4 | 152.9(4) | O2W–Cu3–N1 | 92.1(4) |
| O2W–Cu3–O2W#2 | 180.0 | N1–Cu3–N1#2 | 180.0 |
| Symmetry transformations used to generate equivalent atoms for **2**: #1 –*x*, –*y*–1, –*z*+2; #2 –*x*, –*y*, –*z*+2. | | | |
