# Supplementary material for: Two new POM-based compounds containing a linear tri-nuclear copper(II) cluster and an infinite copper(II) chain, respectively
Source: publisher site journal article supplement (doi:10.1515/znb-2016-0115), 2016-09-22
Supplement: Supplementary file 1 [file B16115-suppinfo2a.pdf › B16115-suppinfo2a.pdf]

# Supporting Information

Ai-xiang Tian, Ya-li Ning, Huai-ping Ni, Xue Hou, Ru Xiao, Jun Ying

## Two new POM-based compounds containing a linear tri-nuclear copper(II) cluster and an infinite copper(II) chain, respectively

DOI: 10.1515/znb-2016-0115

Department of Chemistry, Bohai University, Jinzhou, 121013, P. R. China

**Corresponding author:** Ai-xiang Tian. E-mail: [tian@bhu.edu.cn](mailto:tian@bhu.edu.cn), [ying@bhu.edu.cn](mailto:ying@bhu.edu.cn)

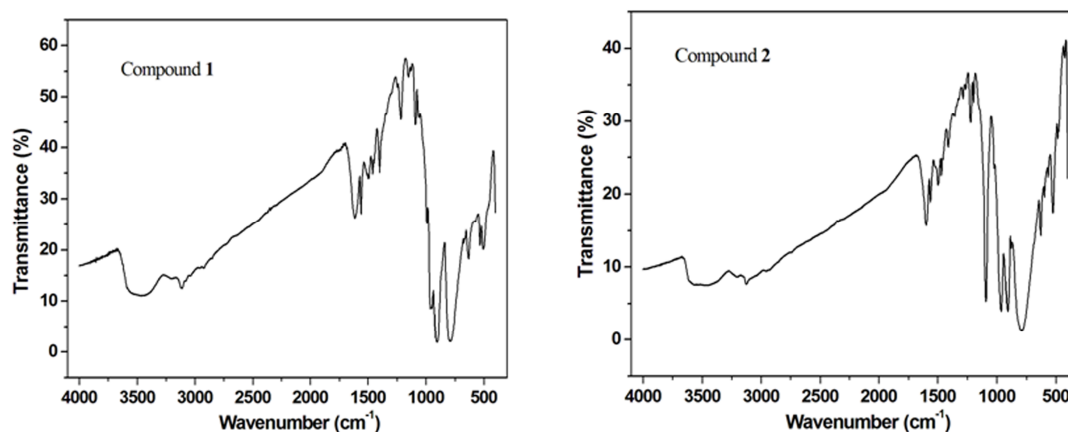

Fig. S1. The IR spectra of compounds **1** and **2**.

Table S1. Selected bond distances (Å) and angles (deg) for compounds **1** and **2**.

| Compound <b>1</b>                                                                                                      |           |              |           |
|------------------------------------------------------------------------------------------------------------------------|-----------|--------------|-----------|
| Cu1–N7                                                                                                                 | 1.97(2)   | Cu1–N4       | 2.004(18) |
| Cu1–O2W                                                                                                                | 2.435(17) | Cu2–N1       | 1.97(2)   |
| Cu2–N5                                                                                                                 | 2.007(16) | Cu2–N8       | 1.98(2)   |
| O1W–Cu2                                                                                                                | 1.938(2)  | O12–Cu2      | 2.231(18) |
| N4–Cu1–N4#1                                                                                                            |           | N7#1–Cu1–N4  | 91.5(8)   |
| N7–Cu1–N7#1                                                                                                            | 180.0     |              |           |
| O2W–Cu1–O2W#1                                                                                                          |           |              |           |
| N7–Cu1–N4                                                                                                              | 88.5(8)   | N7–Cu1–O2W   | 90.4(8)   |
| N4–Cu1–O2W                                                                                                             | 87.2(6)   | N4#1–Cu1–O2W | 92.8(6)   |
| O1W–Cu2–N1                                                                                                             | 92.2(10)  | O1W–Cu2–N8   | 90.6(9)   |
| N1–Cu2–N8                                                                                                              | 173.4(8)  | O1W–Cu2–N5   | 177.8(9)  |
| N1–Cu2–O12                                                                                                             | 98.4(8)   | N8–Cu2–O12   | 87.4(7)   |
| N5–Cu2–O12                                                                                                             | 83.8(7)   | O1W–Cu2–O12  | 95.4(9)   |
| Symmetry transformation used to generate equivalent atoms for <b>1</b> : #1 $-x+1, -y, -z$                             |           |              |           |
| Compound <b>2</b>                                                                                                      |           |              |           |
| Cu1–O1W                                                                                                                | 1.902(8)  | Cu1–N5       | 1.988(9)  |
| O1W–Cu2                                                                                                                | 1.885(8)  | Cu2–O2W      | 1.874(8)  |
| Cu2–N2                                                                                                                 | 1.97(10)  | Cu2–N4       | 2.003(10) |
| Cu2–O28                                                                                                                | 2.86(8)   | O2W–Cu3      | 1.906(8)  |
| Cu3–N1                                                                                                                 | 1.980(9)  | Cu3–O6       | 2.78(8)   |
| O1W–Cu1–O1W#1                                                                                                          |           | O1W–Cu1–N5   | 92.2(4)   |
| N5–Cu1–N5#1                                                                                                            | 180.0     |              |           |
| O2W–Cu2–O1W                                                                                                            | 158.8(5)  | O2W–Cu2–N2   | 88.5(4)   |
| O2W–Cu2–N4                                                                                                             | 97.0(4)   | O1W–Cu2–N4   | 89.1(4)   |
| N2–Cu2–N4                                                                                                              | 152.9(4)  | O2W–Cu3–N1   | 92.1(4)   |
| O2W–Cu3–O2W#2                                                                                                          | 180.0     | N1–Cu3–N1#2  | 180.0     |
| Symmetry transformations used to generate equivalent atoms for <b>2</b> : #1 $-x, -y-1, -z+2$ ;<br>#2 $-x, -y, -z+2$ . |           |              |           |
